# Supplementary material for: MNSFβ Regulates TNFα Production by Interacting with RC3H1 in Human Macrophages, and Dysfunction of MNSFβ in Decidual Macrophages Is Associated With Recurrent Pregnancy Loss
Source: PubMed Central journal article supplement (PMC8473736; doi:10.3389/fimmu.2021.691908), 2021-09-13
Supplement: Table_1.pdf [file Table_1.pdf]

**TABLE S1** | Clinical Characteristic of Recurrent Pregnancy Loss (RPL) Patients and Normal Pregnant (Control) Women Whose Decidua Tissues Were Used in This Study

| <b>Group</b>   | <b>n</b> | <b>Age<br/>(years)</b> | <b>Gestational<br/>Week</b> | <b>Pregnant<br/>history</b> | <b>Childbearing<br/>history</b> | <b>Miscarriage<br/>history</b> |
|----------------|----------|------------------------|-----------------------------|-----------------------------|---------------------------------|--------------------------------|
| Control        | 25       | 33.9 ±4.3              | 7.7 ±1.0                    | 1.8 ±0.6                    | 0.7 ±0.6                        | 0.0 ±0.0                       |
| RPL            | 24       | 32.0 ±4.1              | 7.8 ±0.9                    | 2.8 ±0.8                    | 0.4 ±0.6                        | 2.4 ±0.7                       |
| <i>P</i> value |          |                        |                             | <0.01                       |                                 | <0.0001                        |
