# Supplementary material for: MNSFβ Regulates TNFα Production by Interacting with RC3H1 in Human Macrophages, and Dysfunction of MNSFβ in Decidual Macrophages Is Associated With Recurrent Pregnancy Loss
Source: PubMed Central journal article supplement (PMC8473736; doi:10.3389/fimmu.2021.691908), 2021-09-13
Supplement: Table_2.pdf [file Table_2.pdf]

**TABLE S2** | Sequence of Primers used in Real-time RT-PCR

| <b>Primer</b>             | <b>Nucleotide sequence (5'to3')</b> |
|---------------------------|-------------------------------------|
| homo MNSF $\beta$ Forward | ACTCCATCTTCGCGGTAGC                 |
| homo MNSF $\beta$ Reverse | GGAGCACGACTTGATCTTCC                |
| homo TNF $\alpha$ Forward | CCTCTCTCTAATCAGCCCTCTG              |
| homo TNF $\alpha$ Reverse | GAGGACCTGGGAGTAGATGAG               |
| homo GAPDH Forward        | CTGGGCTACACTGAGCACC                 |
| homo GAPDH Reverse        | AAGTGGTCGTTGAGGGCAATG               |
| homo RC3H1 Forward        | TCCACAATGGACGGATTCCT                |
| homo RC3H1 Reverse        | AACCCAAACTGATGGGCTTTC               |
