# Supplementary material for: MNSFβ Regulates TNFα Production by Interacting with RC3H1 in Human Macrophages, and Dysfunction of MNSFβ in Decidual Macrophages Is Associated With Recurrent Pregnancy Loss
Source: PubMed Central journal article supplement (PMC8473736; doi:10.3389/fimmu.2021.691908), 2021-09-13
Supplement: Table_3.pdf [file Table_3.pdf]

**TABLE S3** | Information of Antibodies Used in This Study

| <b>Antibodies</b>                      | <b>Catalog Number</b> | <b>Company</b> |
|----------------------------------------|-----------------------|----------------|
| Anti-RC3H1 antibody                    | ab70195               | Abcam          |
| Anti- $\beta$ -actin antibody          | P30002M               | Abmart         |
| Rabbit IgG                             | ab172730              | Abcam          |
| Pacific Blue™ anti-human CD45 Antibody | MHCD4528              | eBioscienc     |
| APC anti-human CD14 Antibody           | 367117                | Biologend      |
| Pacific Blue™ anti-human CD45 Antibody | 304022                | Biologend      |
| FITC anti-human CD11c Antibody         | 337214                | Biologend      |
| APC anti-human CD14 Antibody           | 367118                | Biologend      |
| Anti-CK7 antibody                      | ZM-0071               | ZSGB-BIO       |
| Anti-CD14 antibody                     | ab181470              | Abcam          |
| Anti-CD31 antibody                     | ab28364               | Abcam          |
| HRP-secondary antibodies               | 128-035-160           | Jackson        |
| FITC-secondary antibodies              | ZF-0311               | ZSGB-BIO       |
| TRICT-secondary antibodies             | ZF-0313               | ZSGB-BIO       |
| Cyanine Cy™5-secondary antibodies      | 128-175-229           | Jackson        |
