# Supplementary material for: MNSFβ Regulates TNFα Production by Interacting with RC3H1 in Human Macrophages, and Dysfunction of MNSFβ in Decidual Macrophages Is Associated With Recurrent Pregnancy Loss
Source: PubMed Central journal article supplement (PMC8473736; doi:10.3389/fimmu.2021.691908), 2021-09-13
Supplement: Table_4.pdf [file Table_4.pdf]

**TABLE S4** | Proliferation of T-HESCs by Cell Viability Analysis

|                | <b>0 hr</b> | <b>24 hr</b>        | <b>48 hr</b>        |
|----------------|-------------|---------------------|---------------------|
| <b>siNC</b>    | 0.50E+04    | 1.94E+05 ± 7.48E+04 | 1.43E+05 ± 1.21E+04 |
| <b>siMNSFβ</b> | 0.50E+04    | 1.42E+05 ± 4.09E+04 | 1.20E+05 ± 2.09E+04 |
| <i>P</i> value | N/A         | > 0.05              | < 0.05              |

(siNC: T-HESCs transfected by NC siRNA; siMNSFβ: T-HESCs transfected by the MNSFβ specific siRNA)
